# Supplementary material
Source: PubMed Central journal article supplement (PMC8546623)
Supplement: jamaneurol-e213895-s001.pdf [file jamaneurol-e213895-s001.pdf]

## Supplemental Online Content

Cocoros NM, Svensson E, Szépligeti SK, et al. Long-term risk of Parkinson disease following influenza and other infections. *JAMA Neurol*. Published online October 25, 2021. doi:10.1001/jamaneurol.2021.3895

**eAppendix 1.** Medications associated with parkinsonism for exclusion criteria

**eAppendix 2.** Diagnosis codes used to identify exposures of interest

**eAppendix 3.** Month-year ranges used for influenza exposure definitions derived from data from the Danish National Patient Registry

This supplementary material has been provided by the authors to give readers additional information about their work.

**eAppendix 1.** Medications associated with parkinsonism for exclusion criteria

|                  |                       |
|------------------|-----------------------|
| Aripiprazole     | Paliperidone          |
| Asenapine        | Periciazine           |
| Brexpiprazole    | Perphenazine          |
| Chlorpromazine   | Pimozide              |
| Chlorprothixene  | Prochlorperazine      |
| Cinnarizine      | Promazine             |
| Clebopride       | Promethazine          |
| Clozapine        | Quetiapine            |
| Droperidol       | Reserpine             |
| Flunarizine      | Risperidone           |
| Fluphenazine     | Sulpiride             |
| Flupenthixol     | Sulpiride/L-sulpiride |
| Haloperidol      | Tetrabenazine         |
| lloperidone      | Thioridazine          |
| Levopromazine    | Thioproperazine       |
| Loxapine         | Thiopropazate         |
| Lurasidone       | Tiothixene            |
| Mesoridazine     | Trifluoperazine       |
| Metoclopramide   | Valbenazine           |
| Methoxypromazine | Ziprasidone           |
| Olanzapine       |                       |

**eAppendix 2.** Diagnosis codes used to identify exposures of interest

|                                                                                         | International Classification of Diseases, 8 <sup>th</sup> edition                                               | International Classification of Diseases, 10 <sup>th</sup> edition                                                                                                                                                                   |
|-----------------------------------------------------------------------------------------|-----------------------------------------------------------------------------------------------------------------|--------------------------------------------------------------------------------------------------------------------------------------------------------------------------------------------------------------------------------------|
| Influenza                                                                               | 470-474                                                                                                         | J09-J11                                                                                                                                                                                                                              |
| Gastrointestinal infection                                                              | 000-009                                                                                                         | A00-A09                                                                                                                                                                                                                              |
| Tuberculosis                                                                            | 010-018                                                                                                         | A15-A19                                                                                                                                                                                                                              |
| Miscellaneous bacterial infections                                                      | 020-033, 037,039, 080-083, 088, 089, 100-104                                                                    | A20-A38, A42-A44, A48-A49, A65-A79                                                                                                                                                                                                   |
| Meningococcal disease                                                                   | 036                                                                                                             | A39                                                                                                                                                                                                                                  |
| Septicemia                                                                              | 038                                                                                                             | A40-A41                                                                                                                                                                                                                              |
| Sexually transmitted diseases                                                           | 090-099                                                                                                         | A50-A64                                                                                                                                                                                                                              |
| Herpes simplex or zoster                                                                | 053-054                                                                                                         | B00, B02                                                                                                                                                                                                                             |
| Viral hepatitis                                                                         | 070                                                                                                             | B15-B19                                                                                                                                                                                                                              |
| HIV                                                                                     |                                                                                                                 | B20-B24                                                                                                                                                                                                                              |
| Miscellaneous viral infections                                                          | 050-052, 055-057, 060-61, 067-068, 071-079                                                                      | A90-A99, B01, B03-B09, B25-B34                                                                                                                                                                                                       |
| Candidiasis and other fungal infections                                                 | 110-117                                                                                                         | B35-B49                                                                                                                                                                                                                              |
| Parasitic infections                                                                    | 084-087, 120-136                                                                                                | B50-B89                                                                                                                                                                                                                              |
| Other infections or sequelae                                                            | 019, 044, 066, 361, 362, 364.00,366.00, 367.00, 368.00, 368.05, 369.00, 369.01, 380-384, 522.59, 527.39, 528.39 | B90-B99, E06.0, E32.1, H00, H01.0, H03.0, H03.1, H05.0, H06.1, H10, H13.1, H19.1-H19.2, H22.0, H32.0, 44.0, H60.0, H60.1, H60.3, H62.0-H62.3, H65.0, H66.0-H66.4, H67, H70.0, J85.3, K04.0, K04.6, K04.7, K05.2, K11.3, K12.2, N61.9 |
| CNS infections (except meningococcal disease)                                           | 040-043, 045-046, 062-065, 320, 322-323                                                                         | A80-A89, G00-G07                                                                                                                                                                                                                     |
| Heart infections (acute rheumatic fever, infectious peri- or myocarditis, endocarditis) | 390-391, 420-424,                                                                                               | I00-I02, I30.1, I32.0, I33, I38,I39.8, I40.0                                                                                                                                                                                         |
| Upper respiratory tract infection                                                       | 034, 460-465, 501, 503, 508                                                                                     | J00-J06, J36, J39.0, J39.1                                                                                                                                                                                                           |

|                                                                                                                           |                                                                                    |                                                                                                                                    |
|---------------------------------------------------------------------------------------------------------------------------|------------------------------------------------------------------------------------|------------------------------------------------------------------------------------------------------------------------------------|
| Pneumonia                                                                                                                 | 480-486                                                                            | J12-J18                                                                                                                            |
| Other lower respiratory tract infection                                                                                   | 466, 510, 513                                                                      | J20-J22, J44.0, J85.1, J86                                                                                                         |
| Intraabdominal infections                                                                                                 | 255.99, 289.40, 540-542, 566-567, 569, 572, 575, 577.03, 567.08                    | K35, K37, K57.0, K57.2, K57.4, K57.8, K61, K63.0, K65.0, K65.9, K67, K75.0, K75.1, K80.0, K80.3, K80.4, K81.0, K81.9, K83.0, K85.9 |
| Skin and subcutaneous infections, including cellulitis/erysipelas and lymphadenitis                                       | 035, 289.39, 380.00, 522.59, 508.00-508.3, 508.05, 566.00, 590.21, 611.01, 680-686 | A46, J34.0, L00-L08                                                                                                                |
| Septic arthritis, osteomyelitis, myositis                                                                                 | 710-711, 720, 732.99                                                               | M00, M01, M86, M63.0-M63.2                                                                                                         |
| Urinary tract infections                                                                                                  | 590, 595, 599.00, 599.06, 597.03                                                   | N10, N12, N15.1, N30, N33.0, N34.0, N34.1, N39.0                                                                                   |
| Male genital infections                                                                                                   | 601, 604                                                                           | N41, N45                                                                                                                           |
| Female pelvic infections                                                                                                  | 612-614, 616, 620, 622, 629.49                                                     | N70-N77                                                                                                                            |
| Obstetrical infections                                                                                                    | 630, 635, 670, 678.00, 678.01, 678.09                                              | O23, O26.4, O41.1, O74.0, O75.3, O85, O86, O88.3, O91, O98                                                                         |
| Infectious complications of procedures, catheters etc. (e.g. T84.7 Infection due to orthopaedic prosthetic devices, etc.) | 997.69, 998.59, 999.39, 998.79                                                     | T80.2, T81.4, T82.6, T82.7, T83.5, T83.6, T84.5, T84.6, T84.7, T85.7, T88.0, T89.9                                                 |

ICD-10 diagnosis codes are inclusive through three-digit codes unless otherwise noted.

**eAppendix 3.** Month-year ranges used for influenza exposure definitions derived from data from the Danish National Patient Registry

|                               |
|-------------------------------|
| February – March 1978         |
| February – April 1979         |
| March 1980                    |
| January – March 1981          |
| February – March 1983         |
| March – April 1984            |
| January – March 1985          |
| March – April 1986            |
| December 1986 – January 1987  |
| December 1988 – February 1989 |
| December 1989 – February 1990 |
| February 1991                 |
| February 1992                 |
| January – March 1993          |
| November – December 1993      |
| December 1995 – January 1996  |
| February 1997                 |
| February 1998                 |
| February – March 1999         |
| January – February 2000       |
| February 2001                 |
| March 2002                    |

|                              |
|------------------------------|
| March 2003                   |
| December 2003 – January 2004 |
| March 2005                   |
| February – March 2007        |
| January - February 2009      |
| November – December 2009     |
| January – February 2011      |
| December 2012 – March 2013   |
| February – March 2014        |
| January – April 2015         |
| January – March 2016         |
| December 2016                |

We only counted individuals as exposed if they had a diagnosis code of interest in one of the time frames listed. The months are inclusive of all days per month. The monthly influenza-specific diagnosis codes informed the windows for this definition.
